# Supplementary material for: Fluorescence probing and molecular docking analysis of the binding interaction of bovine serum albumin (BSA) with the polarity probe AICCN
Source: Royal Society of Chemistry journal article supplement (doi:10.1039/d2cp04124c), 2023-01-01
Supplement: d2cp04124c1.pdf [file d2cp04124c1.pdf]

### Supplementary Data

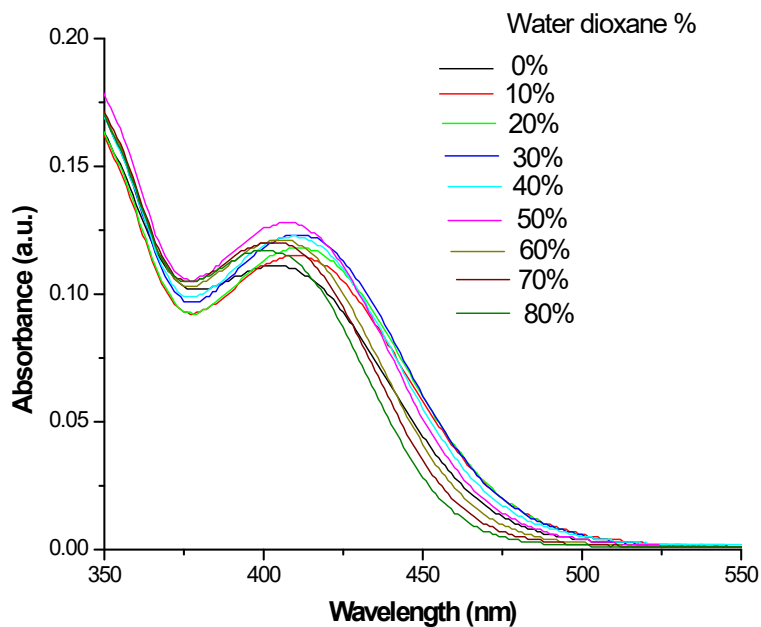

**Fig. S1** Absorption spectra of AICCN indifferent water-dioxane mixtures at fixed probe concentration.

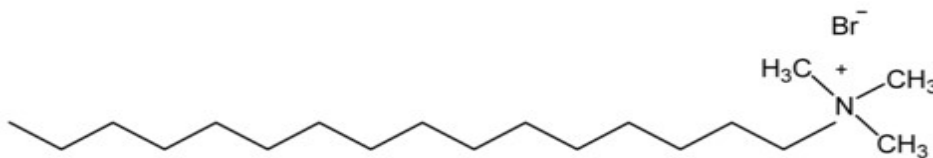

**Scheme S1** The molecular structure of CTAB

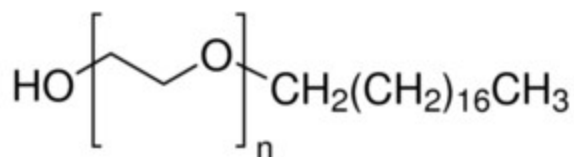

**Scheme S2** The molecular structure of Brij S20.

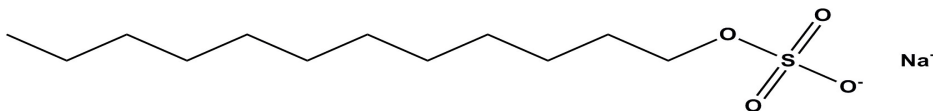

**Scheme S3** The molecular structure of SDS.

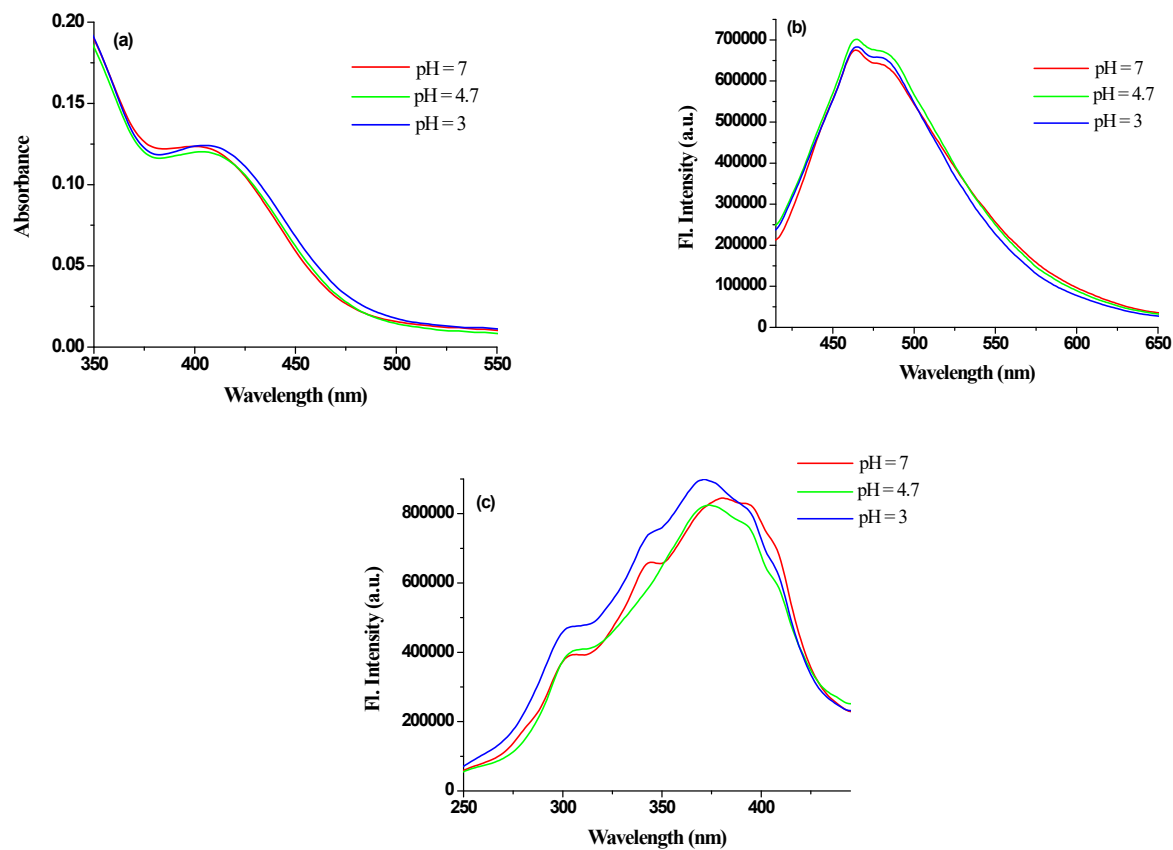

**Fig. S2 (a) Absorption spectra of AICCN in Tris buffer at different pH values; (b) Emission spectra of AICCN in Trisbuffer at different pH values,  $\lambda_{ex} = 400$  nm; (c) Excitation spectra of AICCN in Trisbuffer at different pH values,  $\lambda_{em} = 475$  nm.**

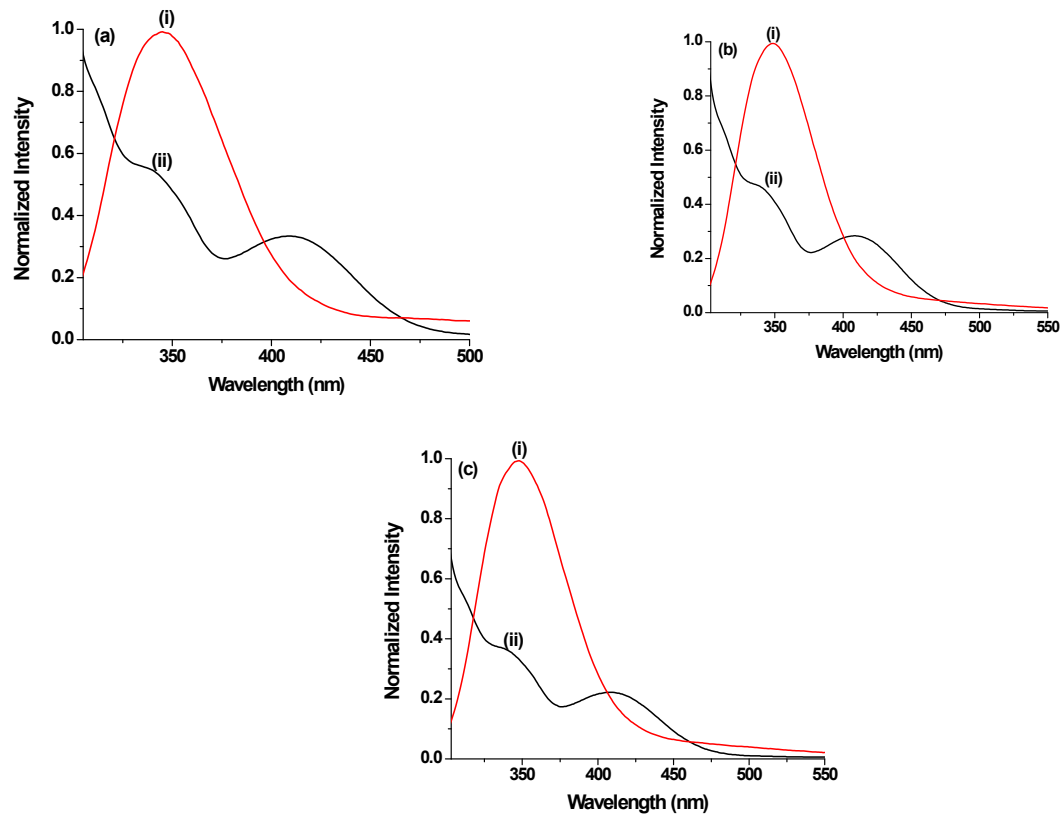

**Fig. S3** Overlap of (i) Emission spectrum of BSA and (ii) Absorption spectrum of AICCN at (a) pH = 7; (b) pH = 4.7 and (c) pH = 3.

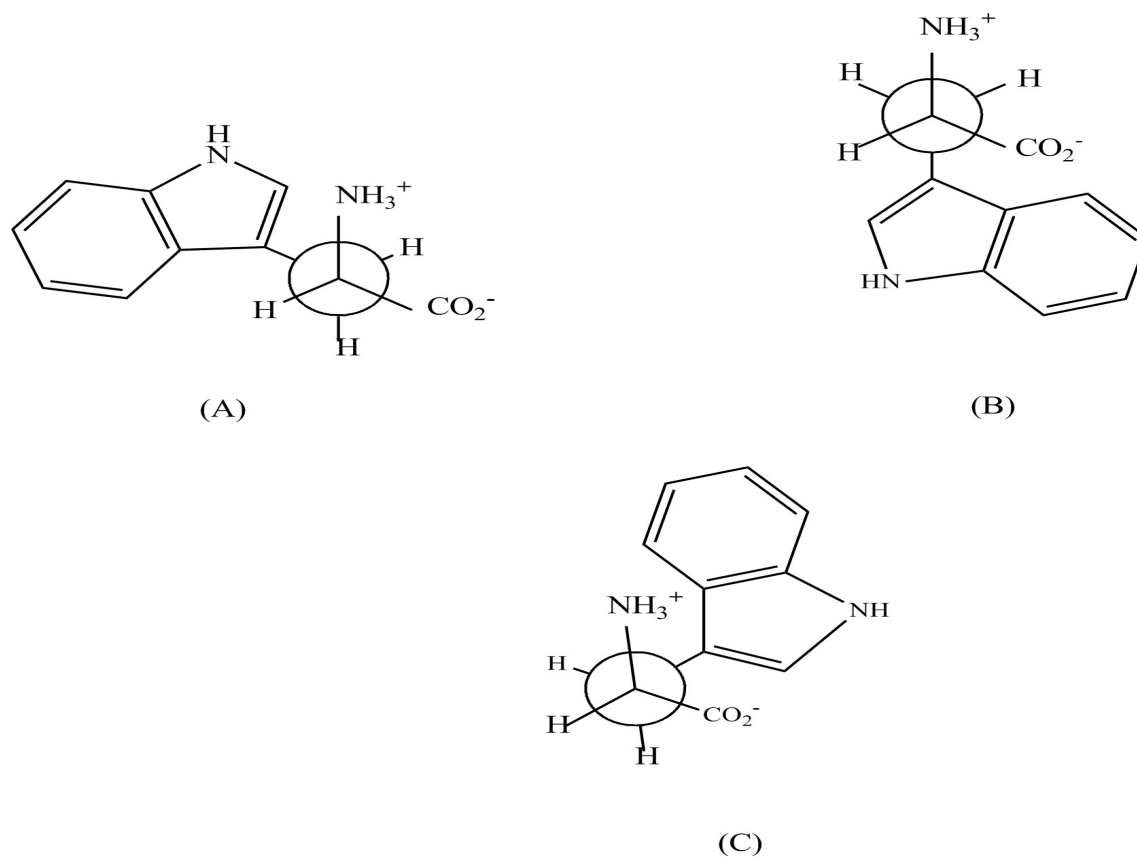

**Fig. S4 Inter-convertible conformers of Trp in Bovine Serum Albumin (BSA)**

**Table S1**

**Fluorescence emission maxima of AICCN at varying concentrations of CTAB**

| Serial No. | Concentration of CTAB (M) $\times 10^{-4}$ | Fluorescence Emission Maxima ( nm ) |
|------------|--------------------------------------------|-------------------------------------|
| 1          | 0                                          | 478                                 |
| 2          | 1.5                                        | 478                                 |
| 3          | 3                                          | 478                                 |
| 4          | 4.5                                        | 479                                 |
| 5          | 6                                          | 480                                 |
| 6          | 7.5                                        | 481                                 |
| 7          | 9                                          | 474                                 |
| 8          | 10.5                                       | 472                                 |
| 9          | 12                                         | 473                                 |
| 10         | 13.5                                       | 472                                 |
| 11         | 15                                         | 472                                 |

**Table S2****Fluorescence emission maxima of AICCN at varying concentrations of S 20**

| <b>Serial No.</b> | <b>Concentration of S-20<br/>(M) <math>\times 10^{-4}</math></b> | <b>Fluorescence Emission<br/>Maxima ( nm )</b> |
|-------------------|------------------------------------------------------------------|------------------------------------------------|
| 1                 | 0                                                                | 482                                            |
| 2                 | 0.5                                                              | 483                                            |
| 3                 | 1                                                                | 481                                            |
| 4                 | 1.5                                                              | 480                                            |
| 5                 | 2                                                                | 481                                            |
| 6                 | 2.5                                                              | 478                                            |
| 7                 | 3                                                                | 483                                            |
| 8                 | 3.5                                                              | 480                                            |
| 9                 | 4                                                                | 480                                            |
| 10                | 4.5                                                              | 481                                            |
| 11                | 5                                                                | 481                                            |

**Table S3****Fluorescence emission maxima of AICCN at varying concentrations of SDS**

| <b>Serial No.</b> | <b>Concentration of SDS<br/>(M) <math>\times 10^{-3}</math></b> | <b>Fluorescence Emission<br/>Maxima ( nm )</b> |
|-------------------|-----------------------------------------------------------------|------------------------------------------------|
| 1                 | 0                                                               | 481                                            |
| 2                 | 1                                                               | 482                                            |
| 3                 | 2                                                               | 481                                            |
| 4                 | 3                                                               | 482                                            |
| 5                 | 4                                                               | 481                                            |
| 6                 | 5                                                               | 479                                            |
| 7                 | 6                                                               | 476                                            |
| 8                 | 7                                                               | 475                                            |
| 9                 | 8                                                               | 480                                            |
| 10                | 9                                                               | 474                                            |
| 11                | 10                                                              | 478                                            |
| 12                | 11                                                              | 475                                            |
| 13                | 12                                                              | 479                                            |
